# Supplementary material
Source: publisher figshare collection journal article supplement (https://frontiersin.figshare.com/ndownloader/files/15517553)
Supplement: Supplementary file [file 15517553]

Supplementary Figure S1

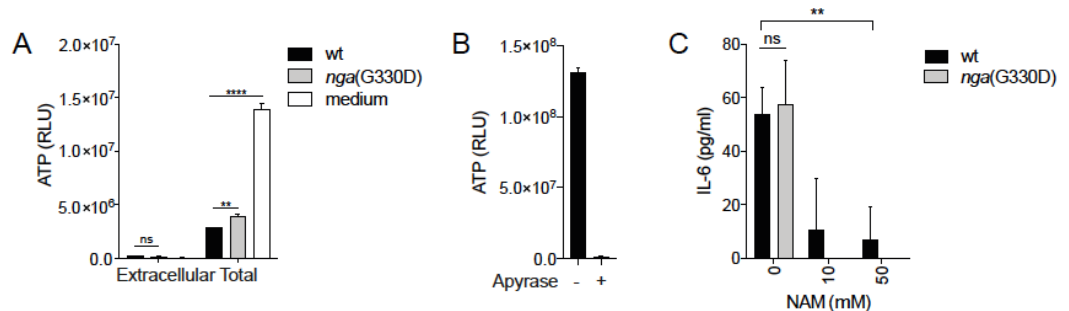

**Supplementary Figure S1. P2X7-dependent IL-1β release occurs independently of extracellular ATP or β-NAD<sup>+</sup> cleavage products.** (A) LPS-primed or untreated P2X7<sup>-/-</sup> BMDMs were infected with wt or *nga*(G330D) GAS and ATP content analyzed by a luminescence-based assay. (B) 5mM ATP was treated with Apyrase for 30 minutes and ATP content was analyzed by a luminescence-based assay. (C) LPS-primed BMDMs were infected with wt or *nga*(G330D) GAS in the presence of NAM. Supernatants were analyzed for IL-6 by ELISA. Graphs show means plus SD for triplicate samples and are representative of at least two experiments. Medium: unprimed, uninfected BMDMs. Significant differences are indicated by asterisks as follows: \*\*, P < 0.01; \*\*\*\*, P < 0.0001. Values that are not significantly different are indicated (ns).

## Supplementary Figure S2

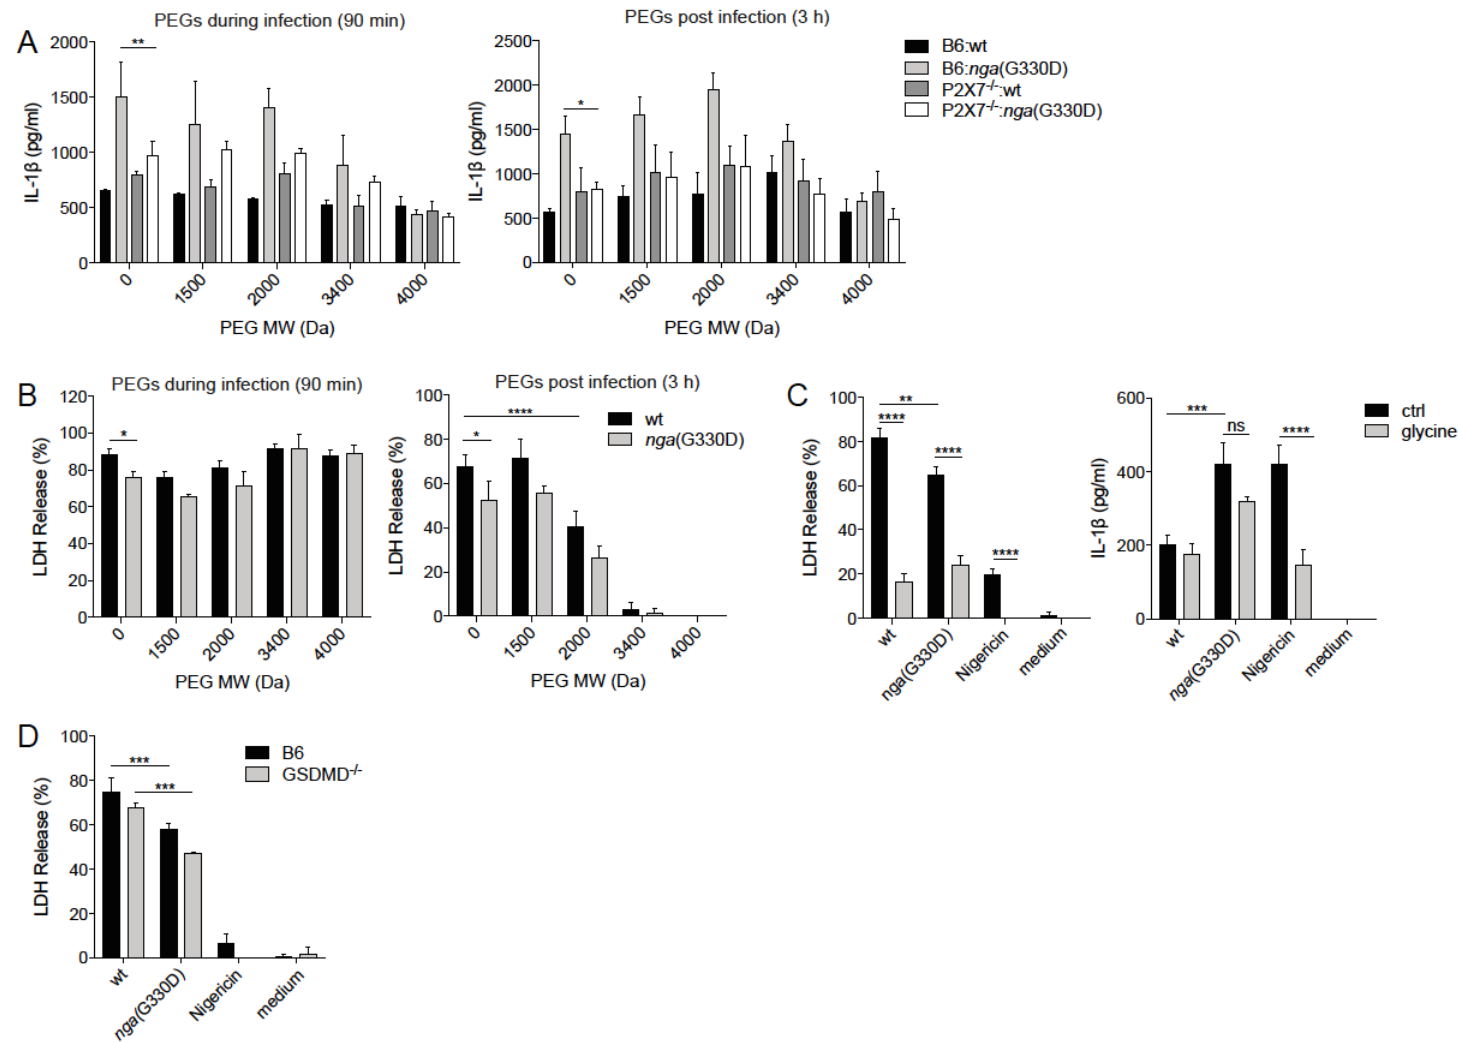

**Supplementary Figure S2. P2X7-mediated release of IL-1 $\beta$  in response to Group A *Streptococcus* occurs independently of cell death.** (A) LPS-primed BMDMs of the indicated genotypes were infected with wt or *nga*(G330D) GAS in the presence of PEGs of different molecular weight during the time periods indicated. Supernatants were analyzed for IL-1 $\beta$  by ELISA. (B) LPS-primed BMDMs were infected with wt or *nga*(G330D) GAS in the presence of PEGs of different molecular weight during the time periods indicated. Cell death was analyzed by measuring LDH release. (C) LPS-primed or untreated BMDMs were infected with wt or *nga*(G330D) GAS in the presence of glycine. Cell death (left panel) was analyzed by measuring LDH release. IL-1 $\beta$  release (right panel) was analyzed by ELISA. (D) LPS-primed or untreated BMDMs of the indicated genotypes were infected with wt or *nga*(G330D) GAS. Cell death was analyzed by measuring LDH release. Graphs show means plus SD for (A) duplicate or (B-D) triplicate samples and are representative of at least two experiments. Nigericin was used as a control for inflammasome activation and glycine-sensitive cell death. Medium: unprimed, uninfected BMDMs. Significant differences are indicated by asterisks as follows: \*, P < 0.05; \*\*, P < 0.01; \*\*\*, P < 0.001; \*\*\*\*, P < 0.0001. Values that are not significantly different are indicated (ns).
